# Supplementary material for: Recovery of xenon from air over ZIF-8 membranes
Source: Royal Society of Chemistry journal article supplement (doi:10.1039/c8cc04154g), 2018-01-01
Supplement: c8cc04154g1.pdf [file c8cc04154g1.pdf]

## Electronic Supplementary Information

### Recovery of Xenon from Air over ZIF-8 Membranes

Ting Wu, Jolie Lucero, Michael A. Sinnwell, Praveen K. Thallapally, \* and Moises A. Carreon\*

| Table of Contents                                                                                                                | Page |
|----------------------------------------------------------------------------------------------------------------------------------|------|
| Materials and Methods                                                                                                            |      |
| 1. Synthesis Procedure.....                                                                                                      | 2    |
| 1.1 Preparation of membrane solution.....                                                                                        | 2    |
| 1.2 ZIF-8 membrane fabrication.....                                                                                              | 2    |
| <b>Table S1.</b> General synthesis conditions of ZIF-8 membranes .....                                                           | 2    |
| 2. Characterization                                                                                                              |      |
| 2.1 PXRD patterns for synthesized ZIF-8 crystals from membrane solutions.....                                                    | 3    |
| <b>Figure S1.</b> XRD patterns of ZIF-8 powders synthesized using the membrane gel.....                                          | 4    |
| 2.2 Membrane gas permeation measurements.....                                                                                    | 4    |
| <b>Table S2.</b> Supporting data of estimated diffusivities for Air/Xe gas mixture over ZIF-8 membranes at room temperature..... | 5    |
| 2.3 Calculation of Isosteric heat of Adsorption ( $Q_{st}$ ).....                                                                | 6    |
| <b>Figure S2.</b> Xe isosteric heat of adsorption ( $-Q_{st}$ ) for ZIF-8 calculated by Virial method.....                       | 6    |
| <b>Figure S3.</b> N <sub>2</sub> isosteric heat of adsorption ( $-Q_{st}$ ) for ZIF-8 calculated by Virial method.....           | 7    |
| 3. References .....                                                                                                              | 7    |

## Materials and Methods

### 1. Membrane Synthesis

#### 1.1 Preparation of membrane solution

ZIF-8 membranes were prepared with the method derived from our previous study.<sup>[1]</sup> Two solutions were used for the membrane synthesis gel. Solution A contained 0.2 g of zinc chloride (Acros, 97%) and 0.3 g of sodium formate (Sigma, > 99%) dissolved in 10 g of methanol (Fisher scientific, 99.9%). Solution B contained 0.96 g of 2-methylimidazole (Sigma-Aldrich, 99%) dissolved in 10 g of methanol. Each solution was stirred separately for 15 minutes at room temperature. Then both solutions were mixed and stirred for an extra 30 minutes.

#### 1.2 ZIF-8 membranes fabrication

Asymmetric porous alumina tubes (Inopor GmbH) were used as supports for ZIF-8 membrane growth in this study, which have an inside diameter of 0.7 cm and an outside diameter of 1.1 cm with a pore size of 100 nm. Teflon tape was wrapped around the outer surface of the support to prevent membrane growth on the external surface. The support's effective permeation area was  $\sim 7.5 \text{ cm}^2$ . The support was placed with the gel in a stainless steel autoclave (4713 General Purpose Pressure Vessel, 45 mL, Parr Instrument) and solvothermally treated in a conventional oven at 120 °C for 3, 4, and 10 hours.

The autoclave was heated at a rate of 25 °C/min and cooled at a rate of 0.5 °C /min during and after the solvothermal treatment. The support was removed and the teflon tape unwrapped after solvothermal treatment. The support was then washed with methanol. To activate, the resulting 1-layered membrane was immersed in 25 mL of methanol for 1 day. A second and third (if needed) layer and a third layer (if needed) were applied following the aforementioned process. The membranes were stored at  $\sim 80 \text{ °C}$  before gas permeation testing. Table S1 shows the detailed synthesis conditions for the membranes reported in Table 1.

For the 1-layered M1 membrane, a healing process was conducted between the first and the second layer. The method was slightly modified from previous study.<sup>[2]</sup> The membrane was wrapped with Teflon tape and transferred to a Teflon liner with a ligand solution composed of 2.27 g of 2-methylimidazole in 20 mL of D.I. water, where it remained for 1 hour to saturate the support. A solution containing 0.11 g of zinc nitrate hexahydrate (Sigma,  $\geq 99.0\%$  KT) in 20 mL of D.I. water was added to the liner. For the final healing process, the liner was placed in an oven at 30 °C for 6 h. The healed membrane was washed in methanol and stirred for 3 days and dried at 60 °C for 6 h. Then the second layer was added to them membrane at 120 C for 3 hours.

**Table S1.** General synthesis conditions of ZIF-8 membranes of this study

| Membrane ID | Number of layers | General synthesis conditions                                                                                                      |
|-------------|------------------|-----------------------------------------------------------------------------------------------------------------------------------|
| M1          | 2                | 1 <sup>st</sup> layer: 120°C for 10 hours<br>Healing process was conducted<br>2 <sup>nd</sup> layer: 120°C for 3 hours            |
| M2          | 2                | 1 <sup>st</sup> layer: 120°C for 10 hours<br>2 <sup>nd</sup> layer: 120°C for 4 hours                                             |
| M3          | 3                | 1 <sup>st</sup> layer: 120°C for 10 hours<br>2 <sup>nd</sup> layer: 120°C for 4 hours<br>3 <sup>rd</sup> layer: 120°C for 3 hours |

## 2. Characterization

### 2.1 Powder X-Ray Diffraction

ZIF-8 crystal powder, synthesized with the same process for membrane synthesis, were collected for Powder X-ray diffraction (PXRD) analysis, which was conducted with an X'Pert PRO MPD X-Ray Diffraction System operated at 45 kV and 40 mA with Cu K $\alpha$ 1 radiation ( $\lambda=1.54059$  Å). ZIF-8 membranes were broken and coated with gold for SEM imaging on a JEOL JSM-7000F scanning electron microscope.

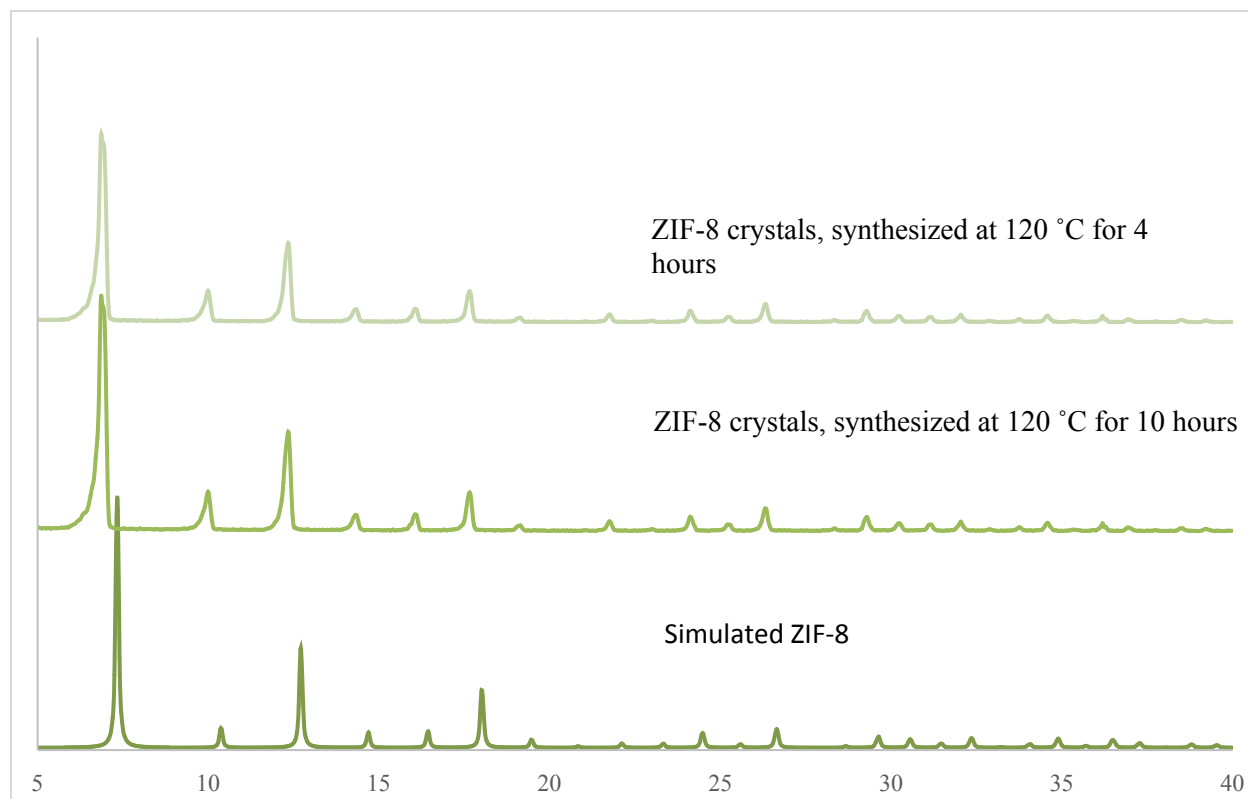

**Figure S1.** XRD patterns of ZIF-8 powders synthesized using the membrane gel. Simulated ZIF-8 pattern is shown for comparison.

## 2.2 Gas Permeation Measurement

Gas mixture permeations were measured in a continuous flow system. The membrane was mounted in a stainless steel module and sealed at each end with silicone O-rings. Fluxes were measured using a bubble flow meter. For mixture separation, premixed air ( $\text{N}_2$  and  $\text{O}_2$ )/Xe=90:10 mixture molar composition (General Air, 99.999%) was used as feed gas. The composition of air was 79%  $\text{N}_2$  and 21 %  $\text{O}_2$ . The total feed flow rate was 40 mL/min. The feed pressure was 223 kPa, and the pressure in the permeate side was 85 kPa for a transmembrane pressure of 138 kPa. The compositions of the feed, retentate and permeate streams were measured, after attaining the steady state, using a gas chromatograph (SRI instruments, 8610C) equipped with a thermal conductivity detector and HAYESEP-D packed column. The oven, injector and detector temperatures in the GC were kept at 40 °C, 120 °C and 150 °C, respectively. All selectivities are permselectivities (ratios of permeances). The permeances were calculated as the fluxes divided by the partial pressure driving forces. Because the module has a cross-flow design, a logarithm of the mean partial pressure drop was used to calculate the driving force. Specifically, the permeance of the component  $i$ ,  $P_i$ , was calculated using:

$$P_i = \frac{J_i}{\Delta p_{\ln,i}} \quad (1)$$

where  $J_i$  is the flux through the membrane for component  $i$ . For the cross-flow configuration, one component preferentially permeates through the membrane, so the partial pressures in the feed and retentate sides are quite different. Therefore, a log-mean pressure drop,  $\Delta p_{\ln,i}$ , was calculated by:

$$\Delta p_{\ln,i} = \frac{(p_{f,i} - p_{r,i})}{\ln[(p_{f,i} - p_{p,i})/(p_{r,i} - p_{p,i})]} \quad (2)$$

where  $p_{f,i}$ ,  $p_{r,i}$ , and  $p_{p,i}$  are partial pressures for component  $i$ , in feed, retentate, and permeate sides, respectively. The permeability is defined as the permeance multiplied by membrane thickness. The separation selectivity,  $\alpha_{i/j}^{sep}$ , is the ratio of the permeances of components  $i$  and  $j$  in the mixture.

Effective diffusion coefficients for these gases were estimated using Fick's law  $= -D \frac{\partial C}{\partial x}$ . For the calculation of diffusion coefficients ( $D$ ), the following assumptions were made: ideal gas, steady state, one-dimension gas transport, and constant membrane thicknesses. The molar gas diffusion flux  $J$  (mol/m<sup>2</sup>s), was calculated as the permeance of each gas multiplied by the log-mean pressure difference  $\Delta p_{\ln,i}$ . The gas concentration gradient ( $\partial C$  in mol/m<sup>3</sup>) was calculated as the difference in molar concentrations between the gas in the feed side and permeate side.  $\partial x$  is membrane thickness. All these parameters were extracted from experimental data.

**Table S2.** Supporting data of estimated diffusivities for Air/Xe gas mixture over ZIF-8 membranes at room temperature.

| Membrane ID | Air concentration gradient (mol/m <sup>3</sup> ) | Air diffusion flux x10 <sup>-3</sup> (mol/m <sup>2</sup> s) | Diffusivity(air) x10 <sup>-10</sup> (m <sup>2</sup> /s) | Xe concentration gradient (mol/m <sup>3</sup> ) | Xe diffusion flux x10 <sup>-5</sup> (mol/m <sup>2</sup> s) | Diffusivity(Xe) x10 <sup>-11</sup> (m <sup>2</sup> /s) |
|-------------|--------------------------------------------------|-------------------------------------------------------------|---------------------------------------------------------|-------------------------------------------------|------------------------------------------------------------|--------------------------------------------------------|
| M1          | 47.9                                             | 3.59                                                        | 9.73                                                    | 8.45                                            | 6.23                                                       | 9.59                                                   |
| M2          | 48.1                                             | 4.52                                                        | 12.2                                                    | 8.29                                            | 7.44                                                       | 12.6                                                   |
| M3          | 47.8                                             | 4.55                                                        | 25.7                                                    | 8.53                                            | 11.8                                                       | 37.4                                                   |

### 2.3 Calculation of Isostatic heat of Adsorption ( $Q_{st}$ ):

The  $Q_{st}$  values for Xe and  $N_2$  gases were calculated using Virial method (Figures S2 and S3).

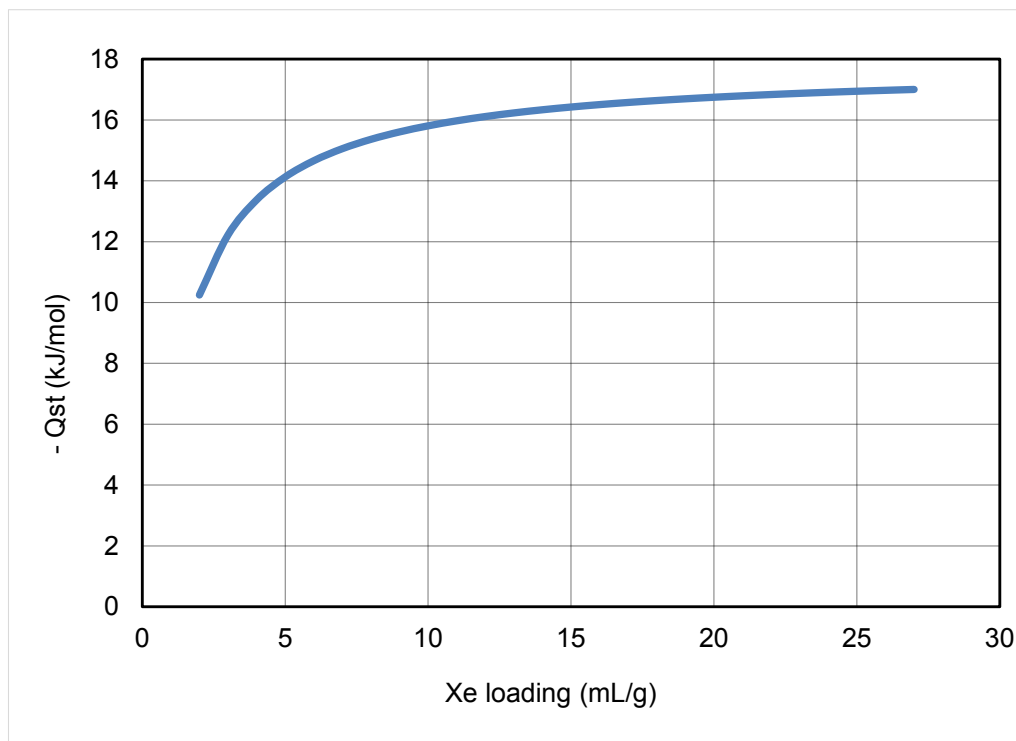

**Figure S2.** Xe isosteric heat of adsorption ( $-Q_{st}$ ) for ZIF-8 calculated by Virial method.

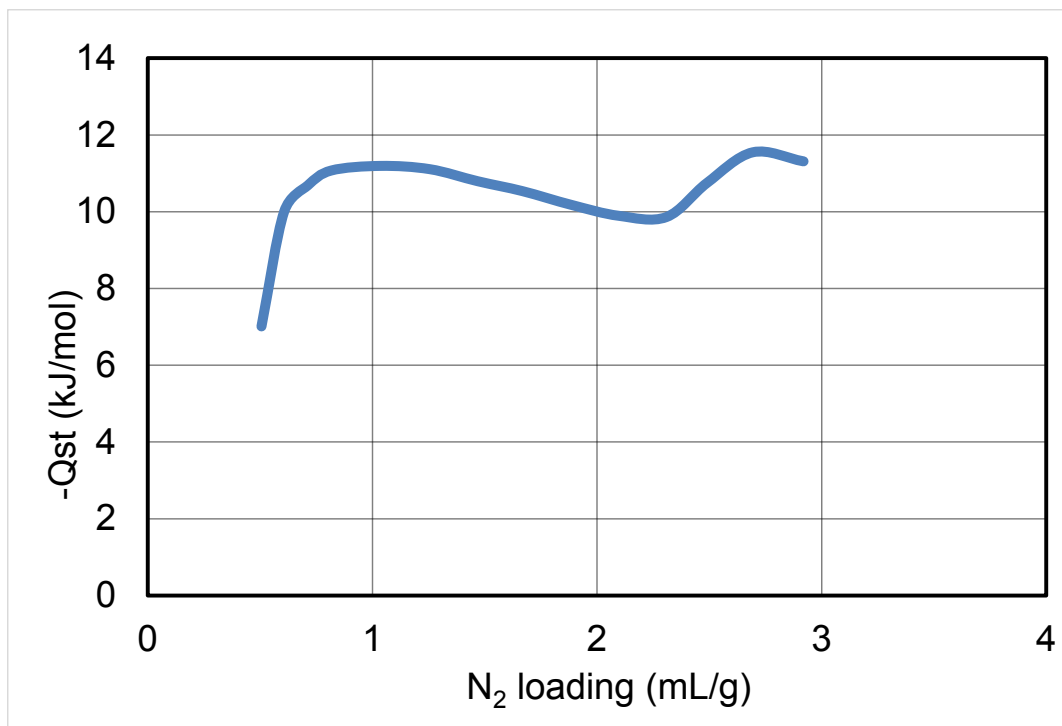

**Figure S3.** N<sub>2</sub> isosteric heat of adsorption (-Q<sub>st</sub>) for ZIF-8 calculated by Virial method.

### 3.0 References

- [1] T. Wu, X. Feng, S. K. Elsaidi, P. K. Thallapally, M. A. Carreon, *Ind. Eng. Chem. Res.* **2017**, *56*, 1682–1686
- [2] H. T. Kwon, H.-K. Jeong *J. Am. Chem. Soc.* **2013**, *135*, 10763– 10768
